# Supplementary material
Source: PubMed Central journal article supplement (PMC6682506)
Supplement: NIHMS1040565-supplement-figures.pdf [file NIHMS1040565-supplement-figures.pdf]

# Appendix A. Supplementary data

[Download Word document \(60KB\)Help with doc files](#)

[Download Word document \(47KB\)Help with doc files](#)

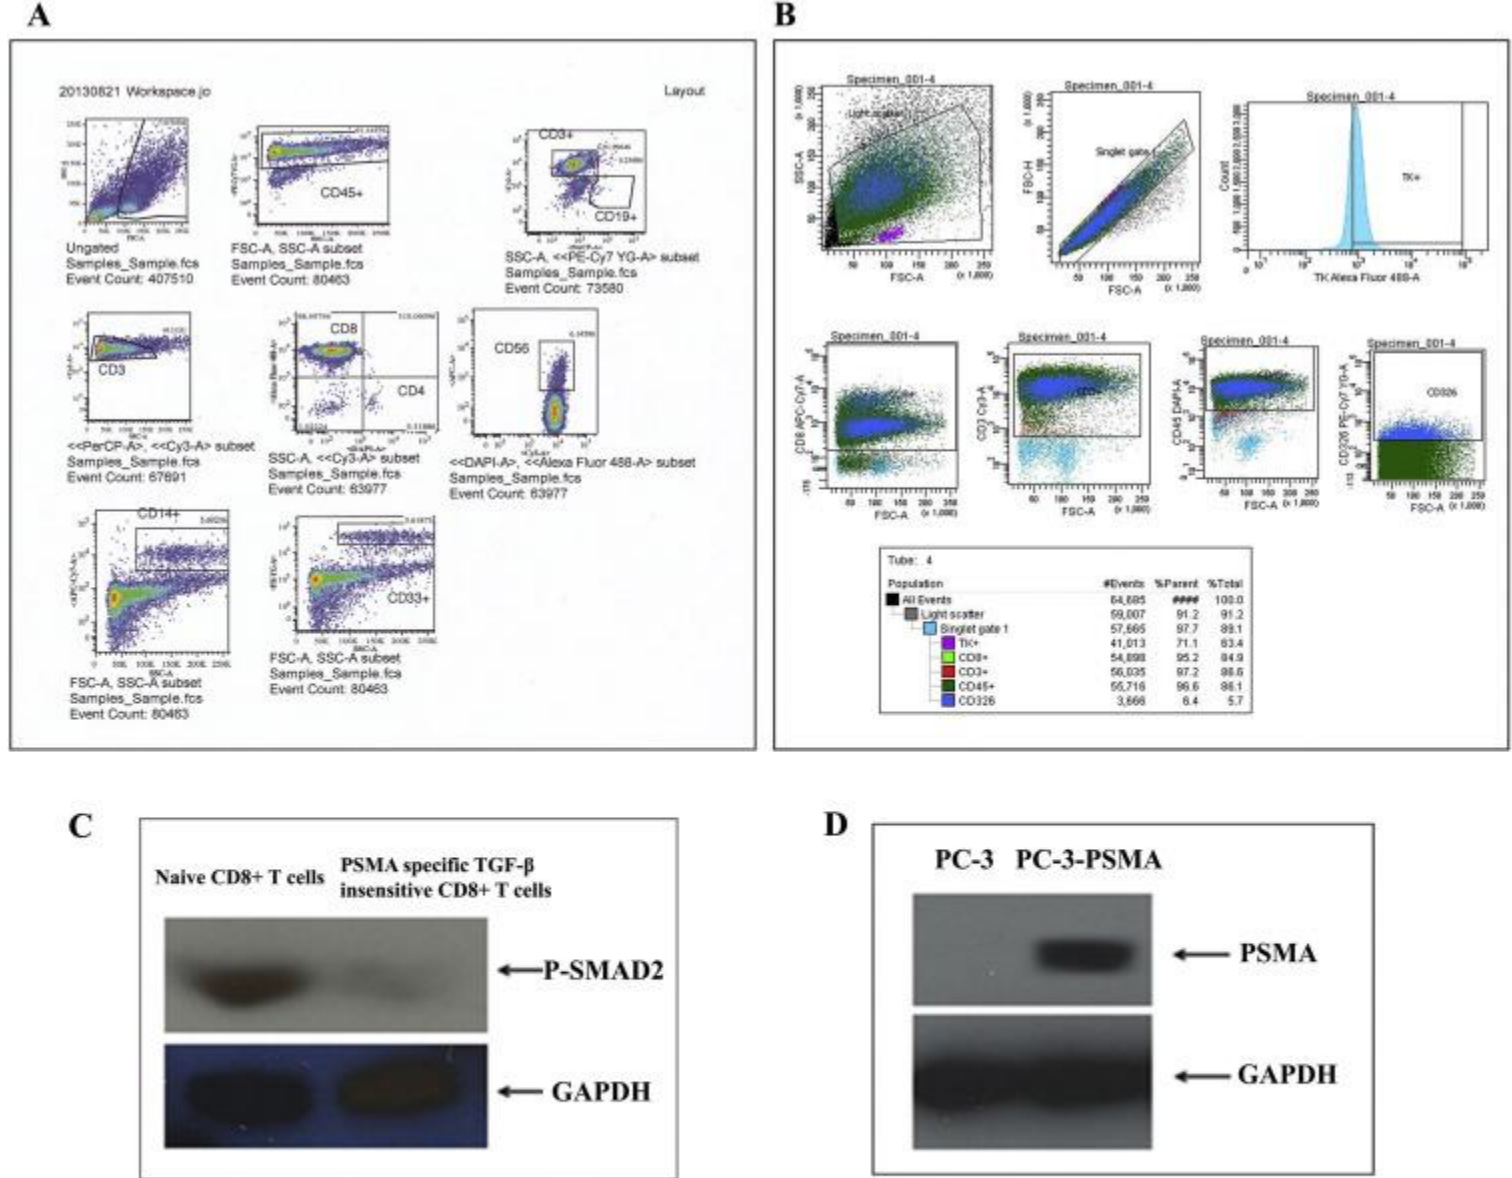

**Supplementary Figure 1**

**A.** Highly purified CD8<sup>+</sup> T cells (CD3<sup>+</sup>: 94.51%; CD8<sup>+</sup>: 98.59%; CD14<sup>+</sup>: 5.69%; CD56<sup>+</sup>: 6.14%; CD45<sup>+</sup>: 91.44%; CD14<sup>+</sup>: 5.69%) were isolated from a patient with mCRPC after leukapheresis. **B.** A total of 71.1% PSMA-specific, TGF- $\beta$  insensitive CD8<sup>+</sup> T cells were TK positive 71.1%. **C.** After infection of T&R1IDN-TK-IRES-PZ1, the p-smad2 were significantly blocked in PSMA-specific TGF- $\beta$  insensitive CD8<sup>+</sup> T cells in compared to naive CD8<sup>+</sup> T cells. **D.** High level expression of PSMA was detected in PC-3-PSMA cells when there is no PSMA expression in PC-3 cells.

1. [Download high-res image \(2MB\)](#)
2. [Download full-size image](#)

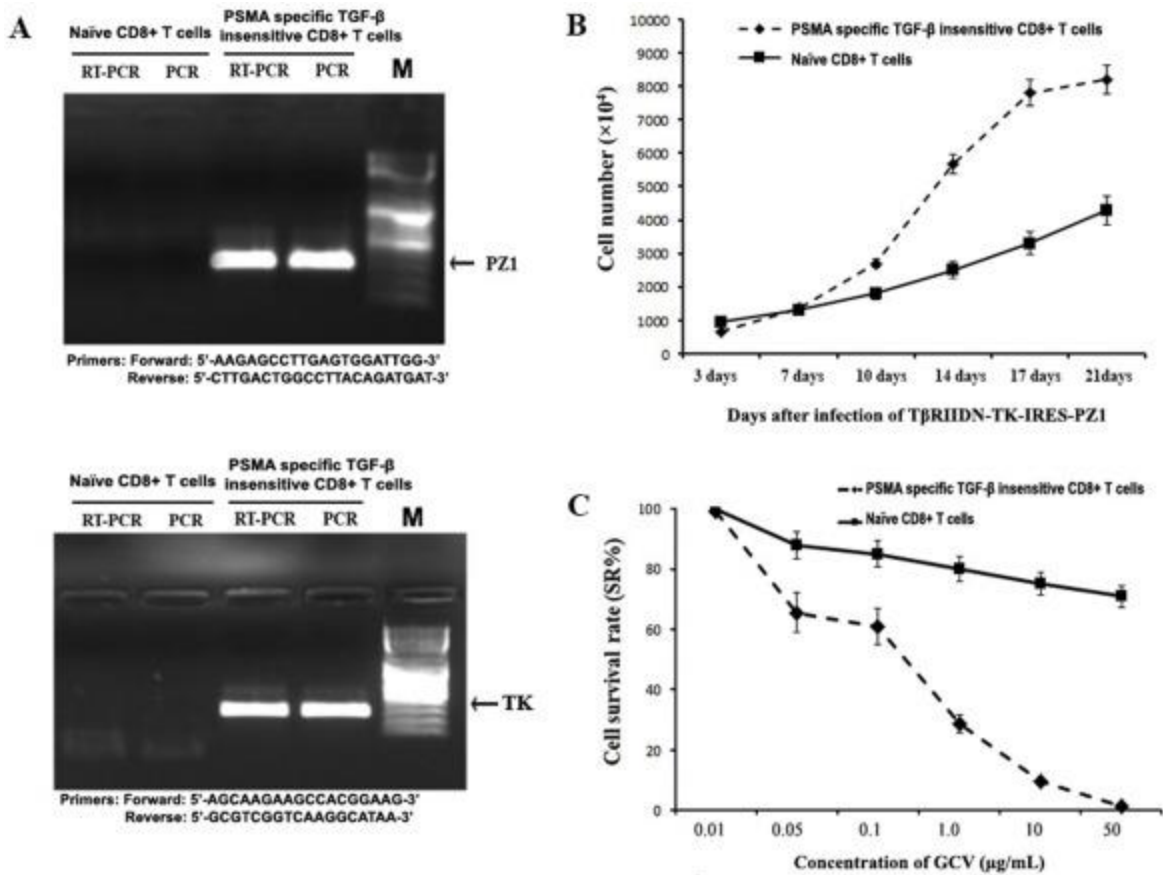

**Supplementary Figure 2**

A. After infection of T $\beta$ RIIDN-TK-IRES-PZ1, high level expression of PZ1 and RT-PCR and PCR in RNA and DNA level was identified in PSMA specific TGF- $\beta$  insensitive CD8<sup>+</sup> T cells (Right two lanes). There was no significant expression of PZ1 or TK detected in naïve CD8<sup>+</sup> T cells (Left two lanes). B. After infection of T $\beta$ RIIDN-TK-IRES-PZ1, the amount of cells were counted twice/weekly. After Day 7, PSMA-specific TGF- $\beta$  insensitive CD8<sup>+</sup> T cells from mCRPC were expanded ex vivo in CPWS with a significantly greater rate of cell division; 23.4 fold in Day 21 (from  $3.5 \times 10^6$  to  $8.2 \times 10^7$ ). This was significantly greater than naïve CD8<sup>+</sup> T cells which could only be expanded 12.2 fold (from  $3.5 \times 10^6$  to  $4.3 \times 10^7$ ). C. The survival rate of PSMA specific TGF- $\beta$  insensitive CD8<sup>+</sup> T cells decreased sharply to 1.3% under the treatment of GCV at 50 $\mu$ g/ml, while the growth of naïve CD8<sup>+</sup> T cells was not affected significantly and kept the survival rate above 80%.

1. [Download high-res image \(748KB\)](#)
2. [Download full-size image](#)

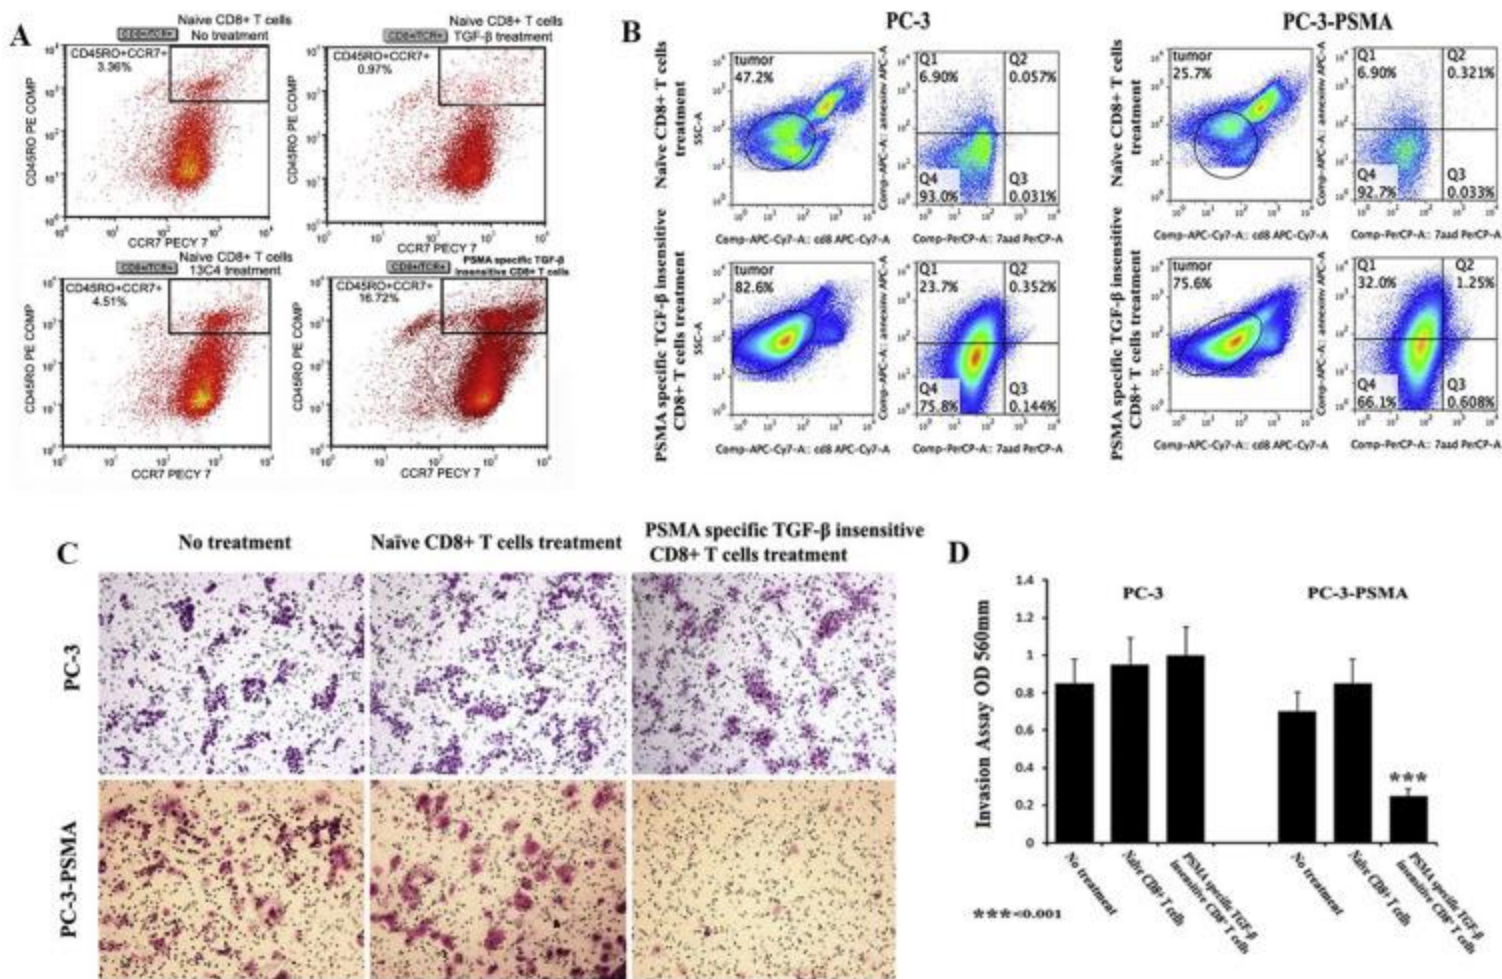

Supplementary Figure 3

**A.** Expression of CD8, TCR, CD45RO and CCR7 in PSMA specific TGF-β insensitive CD8<sup>+</sup> T cells, naive CD8<sup>+</sup> T cells with treatment of TGF-β or control 13C4 antibody. Analysis was performed by immunofluorescent FACS (CD45RO-PE, CCR7-PECY7; see Supplementary Materials and Methods). **B.** Markers for early apoptosis (Annexin V) and late apoptosis (7-aad) were evaluated by double staining immunofluorescent FACS. Incubation with PSMA-specific, TGF-β-insensitive CD8<sup>+</sup> T cells induced 23.7% and 32.0% expression of Annexin V in PC-3 and PC-3-PSMA respectively in compared to 6.9% and 6.9% respectively when incubation with naive CD8<sup>+</sup> T cells. There is no significant difference on expression of 7-aad between above treatment groups. **C.** PC-3 and PC-3-PSMA possessed equal invasive capabilities. There were no significant changes in cell motility through a Matrigel-coated polycarbonate membrane when co-cultured with naive CD8<sup>+</sup> T cells. The invasion of PC-3-PSMA cells, but not PC-3 cells, could be inhibited by co-culture with PSMA specific TGF-β insensitive CD8<sup>+</sup> T cells. **D.** Absorbance values. This result indicates PSMA specific TGF-β insensitive CD8<sup>+</sup> T cells suppressed invasion of PSMA positive PCa specifically.

1. [Download high-res image \(2MB\)](#)
2. [Download full-size image](#)



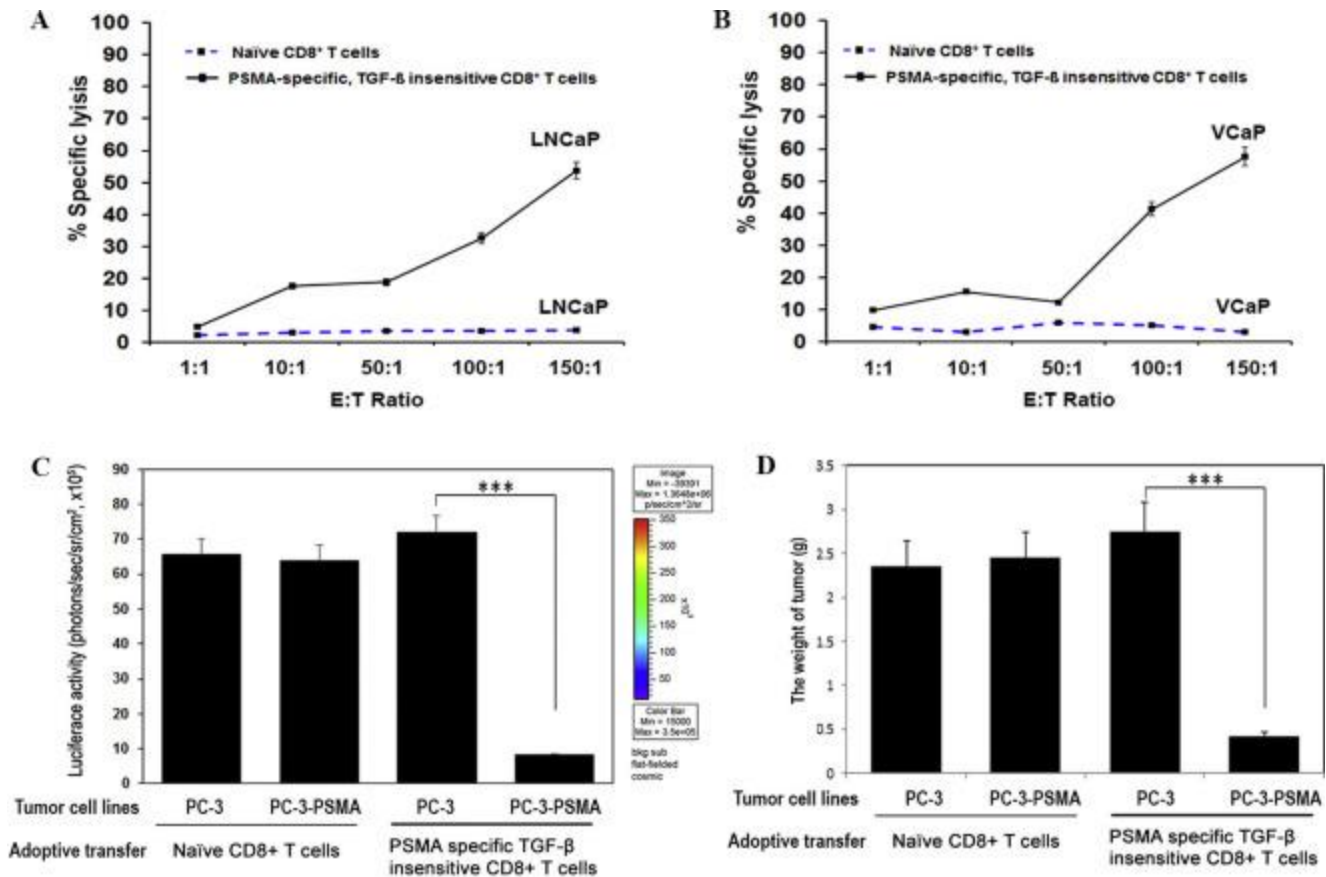

Supplementary Figure 4

A. CTL for LNCaP and VCaP cell lines was done by using the conventional <sup>51</sup>Cr release assay (see Supplementary Materials and Methods). Naive CD8<sup>+</sup> T cells and PSMA specific, TGF- $\beta$  insensitive CD8<sup>+</sup> T cells were co-cultured with <sup>51</sup>Cr-labeled targets at the specific E/T ratios. LNCaP cells or VCaP cells were used as the targets respectively; PSMA specific, TGF- $\beta$  insensitive CD8<sup>+</sup> T cells generated 53.7% specific lysis against LNCaP cells and generated 57.6% specific lysis against VCaP cells (B) respectively when there was lower than 10% lysis against both PCa cell lines was found by treatment with naive CD8<sup>+</sup> T cells. C. Right before the mice were sacrificed at the end of the 35-day treatment period, IVIS 100 imaging system was used to measure the luciferase activity of each tumor. The average luciferase density was  $71.8 \times 10^5$  [photons/sec/sr/cm<sup>2</sup>] for PC-3 tumor and  $8.1 \times 10^5$  for PC-3-PSMA tumor under the treatment of PSMA-specific TGF- $\beta$ -insensitive CD8<sup>+</sup> T cells. The average luciferase density was  $65.5 \times 10^5$  [photons/sec/sr/cm<sup>2</sup>] for PC-3-PSMA tumor and  $63.8 \times 10^5$  for PC-3 tumor under the treatment of naive CD8<sup>+</sup> T cells ( $P < 0.05$ ). D. Mice were sacrificed and tumors were isolated. The average tumor weight of PC-3-PSMA tumor was 0.413g. In comparison, PC-3 tumors were found in all mice treated with PSMA-specific TGF- $\beta$ -insensitive CD8<sup>+</sup> T cells, and the average weight of PC-3 tumors was 2.75g correspondingly ( $P < 0.05$ ). The corresponding values in the mice that received adoptive transfer of naive CD8<sup>+</sup> T cells were 2.45g and 2.36g, respectively.

1. [Download high-res image \(1MB\)](#)
2. [Download full-size image](#)

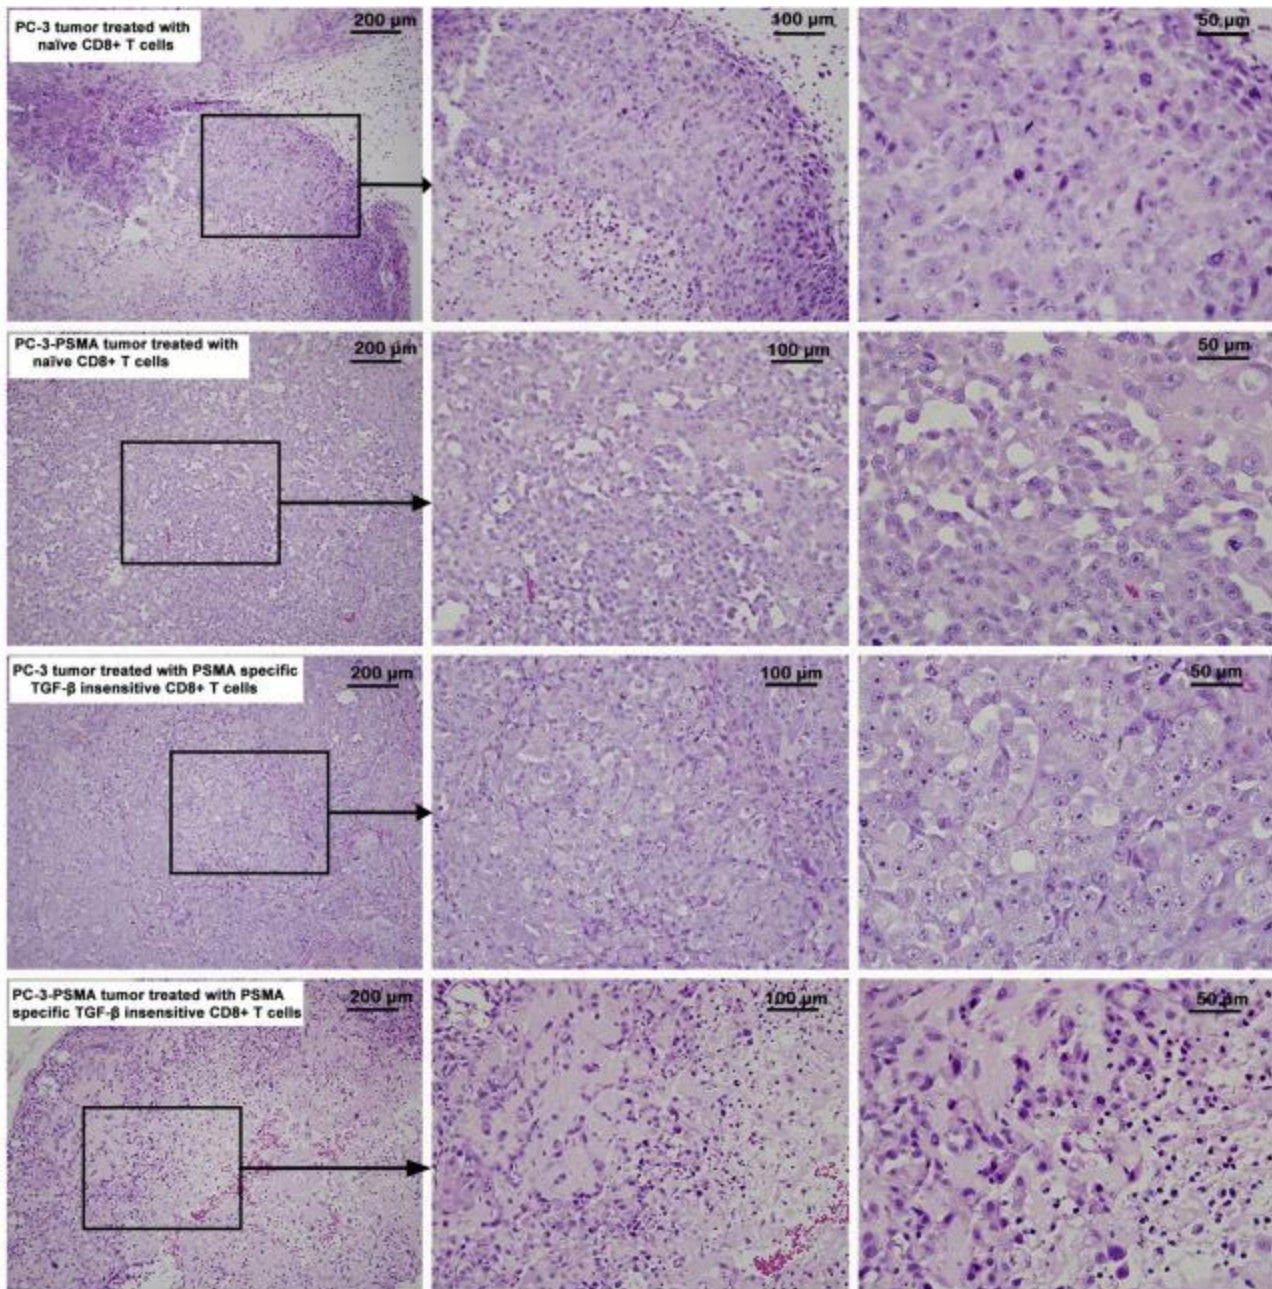

## Supplementary Figure 5

Representative histologic features (H&E staining) of tumor nodules from animals that received adoptive transfer of naive CD8<sup>+</sup> T cells or adoptive transfer with PSMA-specific TGF- $\beta$ -insensitive CD8<sup>+</sup> T cells (time point 35 days following the treatment). These animals received injection of tumor cells 7 days before the adoptive transfer. Large amount of nuclear fusion, fragmentation and necrosis were found in PC-3-PSMA tumors but not PC-3 tumors that received the adoptive transfer of PSMA-specific TGF- $\beta$ -insensitive CD8<sup>+</sup> T cells. No degenerative changes or necrosis was noted in either PC-3 or PC-3-PSMA tumors of which received adoptive transfer of naive CD8<sup>+</sup> T cells.

1. [Download high-res image \(4MB\)](#)
2. [Download full-size image](#)



# The strategy of immunotherapy by adoptive transfer of PSMA-specific, TGF- $\beta$ insensitive CD8<sup>+</sup> T cells

mCRPC patient

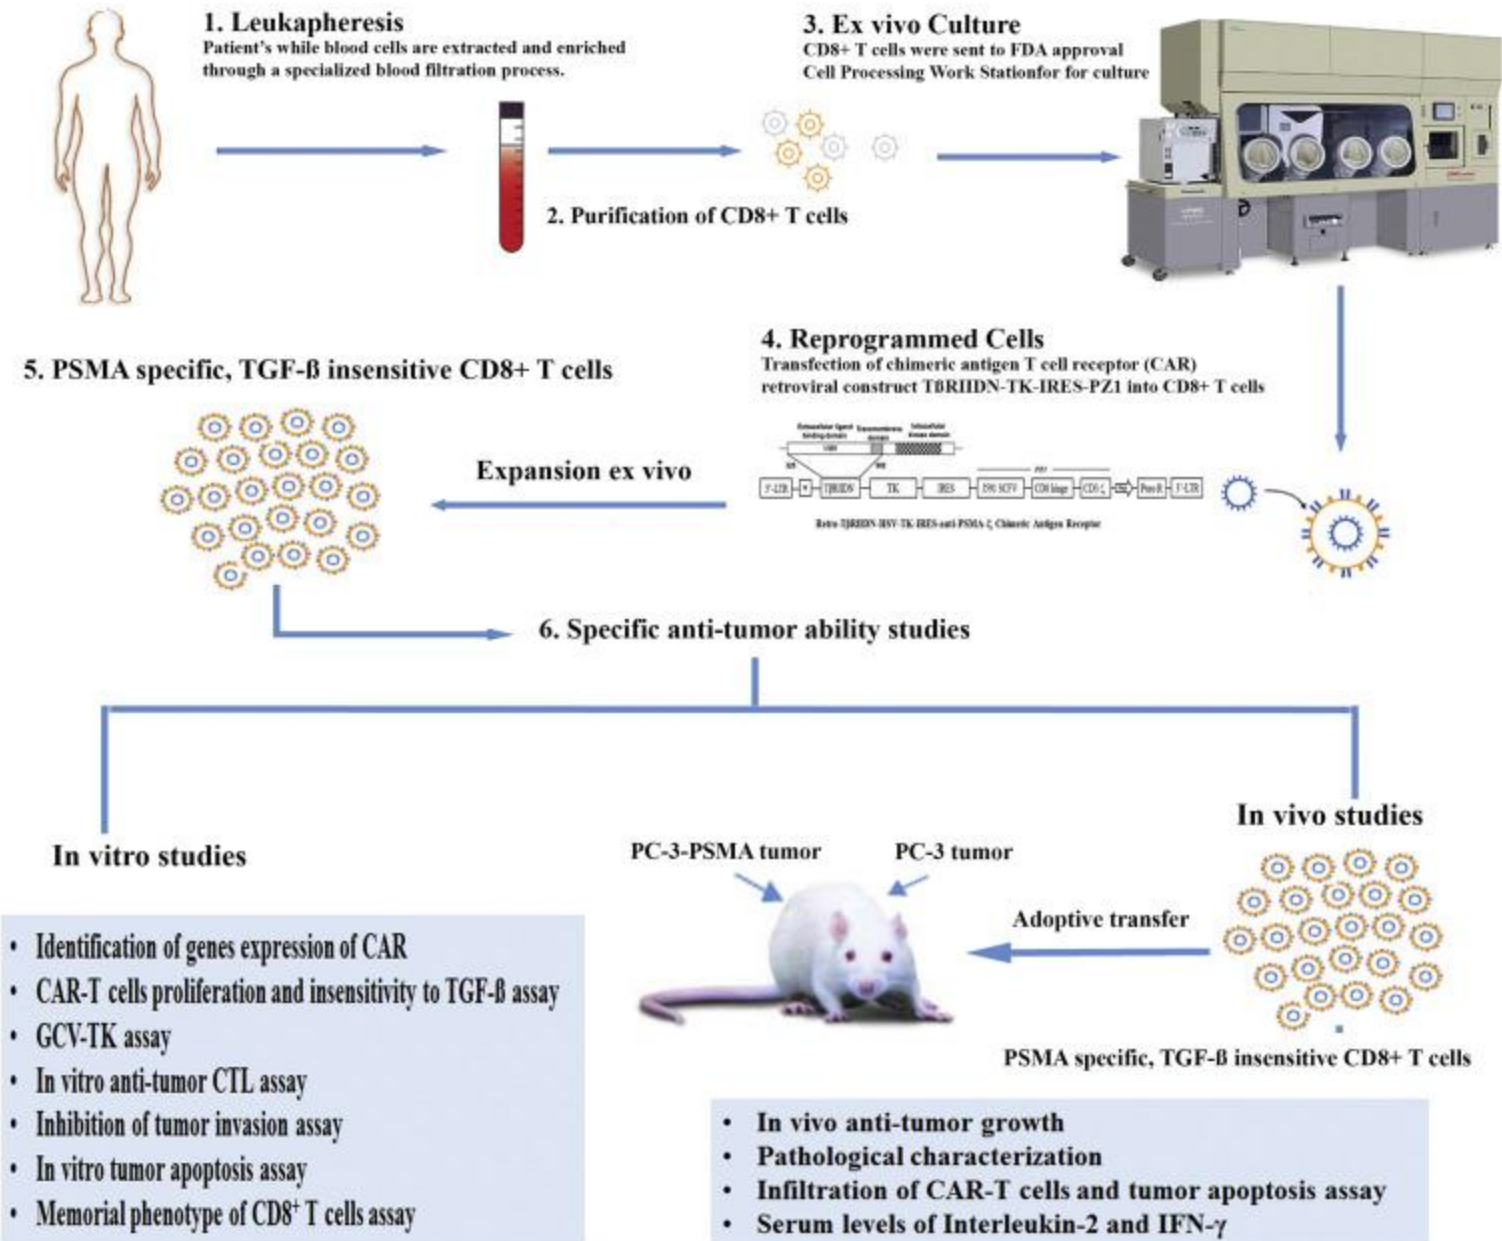

## Supplementary Figure 6

Schematic Summary Diagram for strategy of immunotherapy by PSMA-specific TGF- $\beta$ -insensitive CD8<sup>+</sup> T cells. 1. Collection of white blood cells from mCRPC patient by leukapheresis; 2. Purification of CD8<sup>+</sup> T cells; 3. Ex vivo culture of CD8<sup>+</sup> T cells in FDA approval Cell Processing Work Station (CPWS); 4. Reprogrammed cells by transfection of T $\beta$ RIIDN-TK-IRES-PZ1 CAR retroviral construct into the CD8<sup>+</sup> T cells; 5. Generation and ex vivo expansion of PSMA specific, TGF- $\beta$  insensitive CD8<sup>+</sup> T cells; 6. Specific anti-tumor ability studies in vitro and in vivo.

1. [Download high-res image \(2MB\)](#)
2. [Download full-size image](#)
